# Supplementary material
Source: publisher figshare collection journal article supplement (https://gsajournals.figshare.com/ndownloader/files/24314933)
Supplement: Supplementary file 1 [file 24314933]

## Sheet: Table S1
Table S1: Average Sap abundance
	White Cells						Opaque Cells
CGD Name	Average Percent of Total Counts, SC5314 White	St. Dev. Percent of Total Counts, SC5314 White	Average Percent of Total Counts, L26 White	St. Dev. Percent of Total Counts, L26 White	Average Percent of Total Counts, P37005 White	St. Dev. Percent of Total Counts, P37005 White	Average Percent of Total Counts, SC5314 Opaque	St. Dev. Percent of Total Counts, SC5314 Opaque	Average Percent of Total Counts, L26 Opaque	St. Dev. Percent of Total Counts, L26 Opaque	Average Percent of Total Counts, P37005 Opaque	St. Dev. Percent of Total Counts, P37005 Opaque
Sap1	0.427481	0.0431821	0.454718	0.0928189	0.372162	0.13925	15.067	0.821485	16.6732	0.760948	20.3509	0.905036
Sap2	3.54198	0.188226	1.0989	0.141783	6.17789	0.263158	0.529287	0.29941	0.195695	0.0587084	0.75188	0.425327
Sap3	0.641221	0.0747936	0.189466	0.053589	0.707108	0.0526317	9.2096	0.149705	8.21918	0.439334	7.66917	1.2994
Sap7	1.12977	0.172728	1.97044	0.283566	2.45627	0.157895	0	0	0	0	0	0
Sap8	0.183206	0.183206	0.227359	0.227359	0	0	1.09386	0.0998034	1.36986	0.0553508	0	0
Sap9	0.549618	0.0747936	0.416825	0.107178	0.521027	0.13925	0.105857	0	0	0	0	0
Sap10	0.48855	0.311391	0.947329	0.386436	1.11649	0.0911608	0.247001	0.0499017	0.234834	0	0.300752	0.122781
Sap98	0	0	0	0	0	0	0.67043	0.0998034	5.24462	0.221403	6.71679	0.283552
Sap99	0.305344	0.0863642	0.71997	0.053589	0.669892	0.0911608	7.33945	0.132027	18.8258	1.84244	22.1053	2.659
All Saps	7.26718		6.02501		12.0208		34.2625		50.7632		57.8947
